# Supplementary material
Source: PubMed Central journal article supplement (PMC1065717)

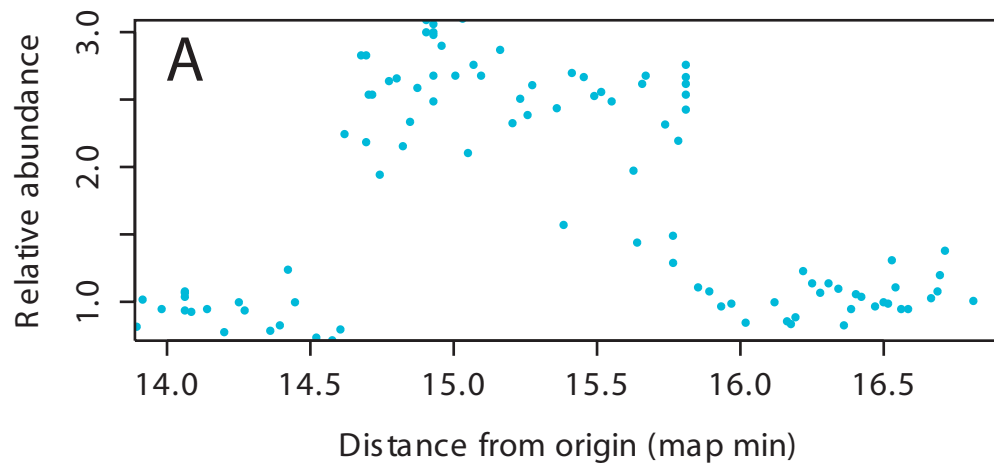

**B**

Marker

WPC2

W3110

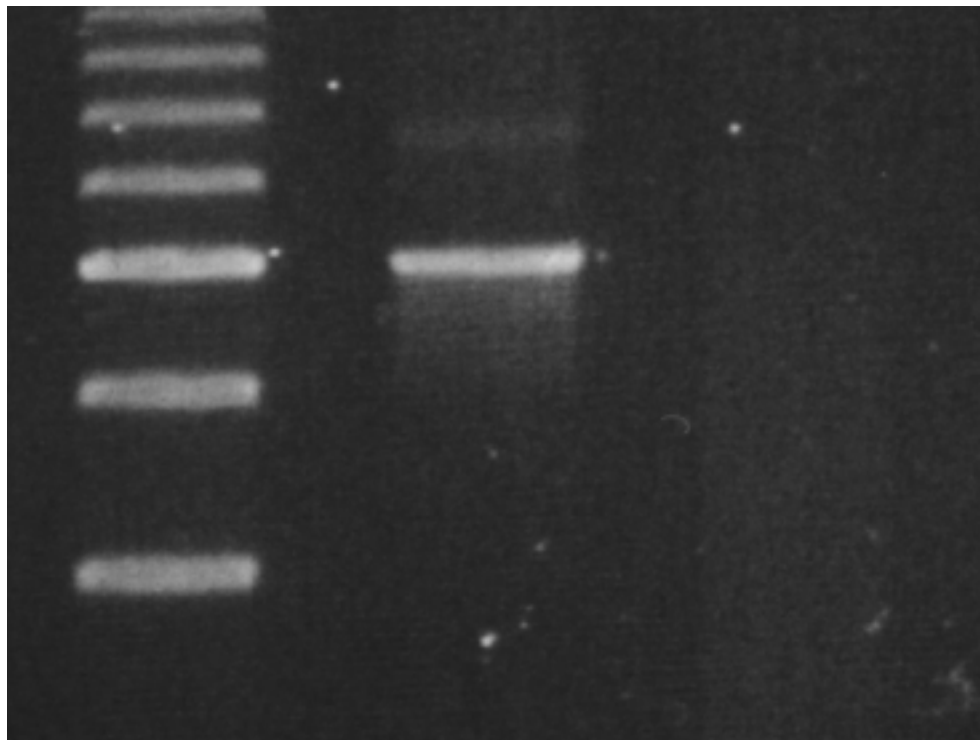

Supplement: pnas_102_11_3942__1.pdf [file pnas_102_11_3942__1.pdf]
